# Supplementary material for: Alterations in DNA conformation and histone phosphorylation resulting from double-strand breaks induced in HeLa cells – a spectroscopic and immunostaining approach
Source: Research Square preprint supplement (doi:10.21203/rs.3.rs-3427641/v1), 2023-10-19
Supplement: Supplementary file 1 [file fc9aa0cf961741662a311127.pdf]

## Alterations in DNA conformation and histone phosphorylation resulting from double-strand breaks induced in HeLa cells – a spectroscopic and immunostaining approach

Michał Czaja<sup>1,2,‡</sup>, Magdalena Giergiel<sup>1,‡</sup>, Katarzyna Skirlińska-Nosek<sup>1,2,‡</sup>, Kamila Sofińska<sup>1</sup>, Olga Adamczyk<sup>1</sup>, Dawid Lupa<sup>1</sup>, Sara Seweryn<sup>1,2</sup>, Zenon Rajfur<sup>1</sup>, Giovanni Birarda<sup>3</sup>, Federica Piccirilli<sup>3</sup>, Lisa Vaccari<sup>3</sup>, Marek Szymoński<sup>1</sup>, Ewelina Lipiec<sup>1,\*</sup>

<sup>1</sup> Jagiellonian University, Faculty of Physics, Astronomy, and Applied Computer Science, M. Smoluchowski Institute of Physics, Krakow, Poland.

<sup>2</sup> Jagiellonian University, Doctoral School of Exact and Natural Sciences, Krakow, Poland.

<sup>3</sup> Elettra-Sincrotrone Trieste S.C.P. A, Trieste, Italy.

‡ Authors contributed equally

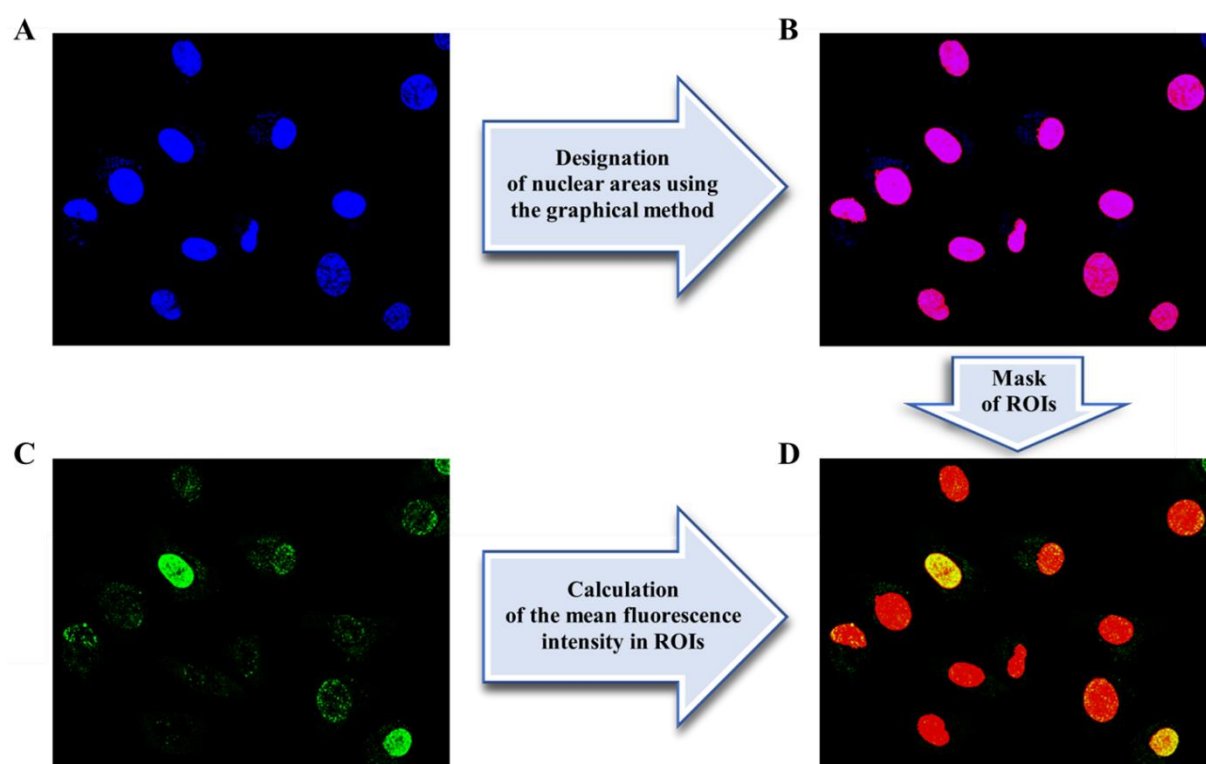

**Figure S1** The schematic representation of the analytical method. The chromatin was stained with DAPI dye and is depicted in blue in panel A. Panel B displays the identified nuclear regions, marked in pink. The intensity of phosphorylated histone H2AX staining, shown in green in panel C, was measured within these selected regions. The resultant mask of the regions of interest is highlighted in red in panel D, which shows the overlapping of images from panels B and C

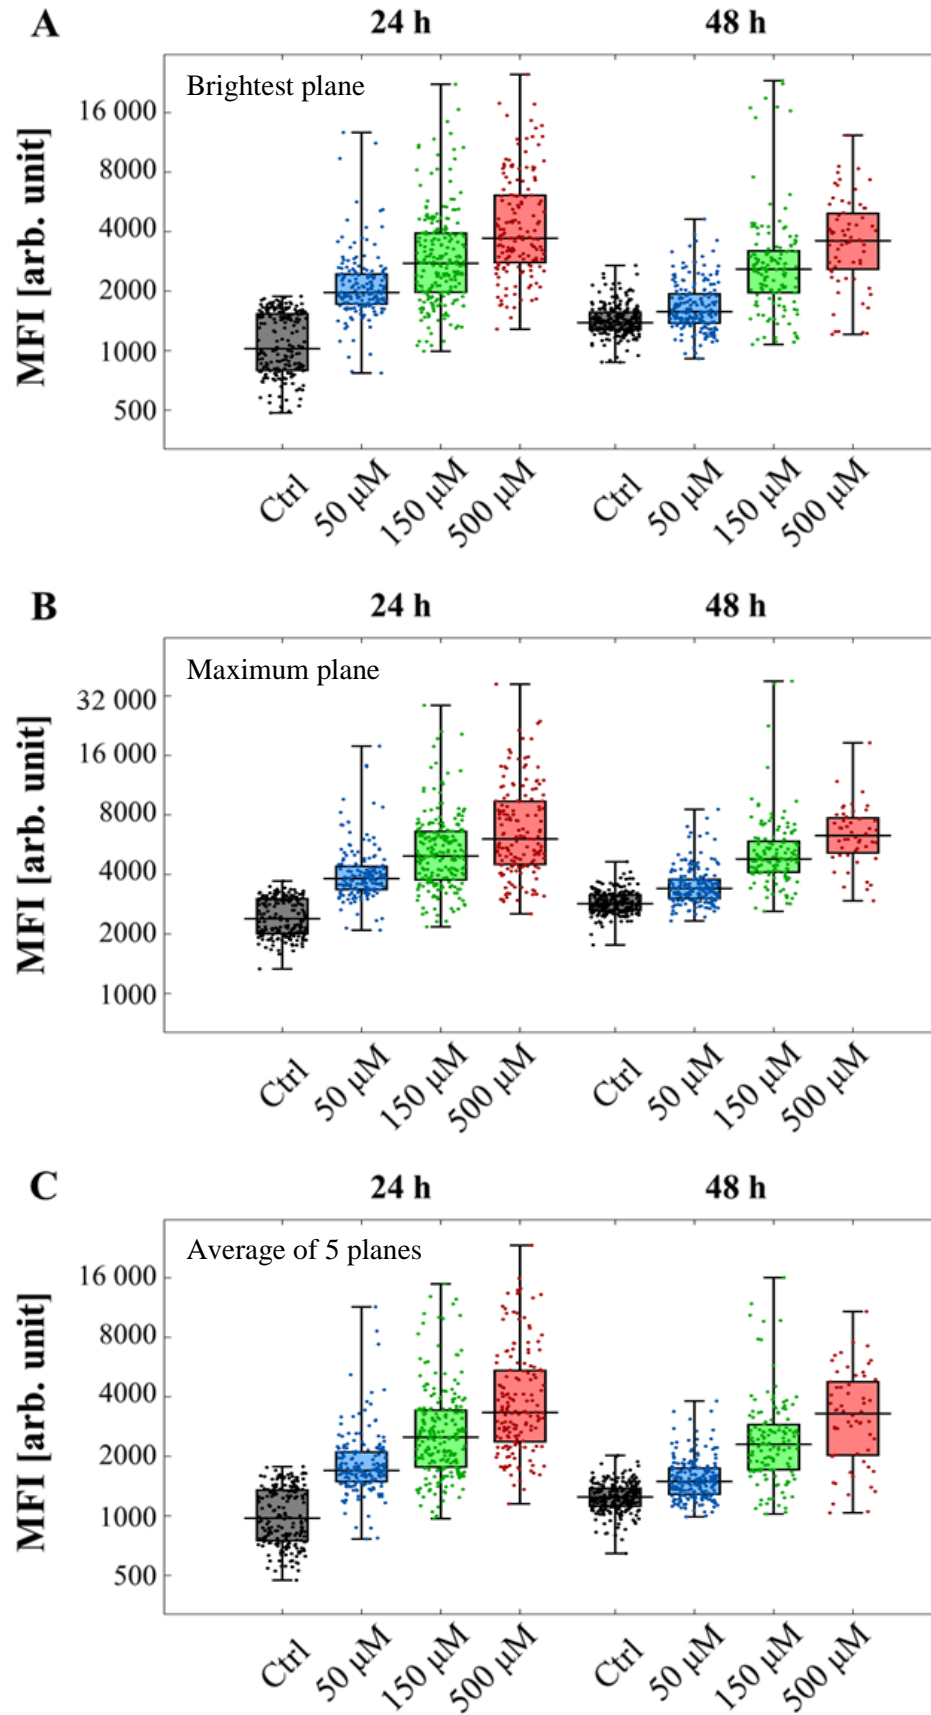

**Figure S1** Comparison of three analysis approaches: A MFI for the brightest phosphorylated histone H2AX staining plane; B MFI for the maximum fluorescence plane; C MFI for the average of five consecutive planes.
